# Supplementary material for: Comparative Antennal Morphometry and Sensilla Organization in the Reproductive and Non-Reproductive Castes of the Formosan Subterranean Termite
Source: MDPI journal article supplement (doi:10.3390/insects12070576), 2021-06-24
Supplement: s1 [file s1]

## Supplementary Information

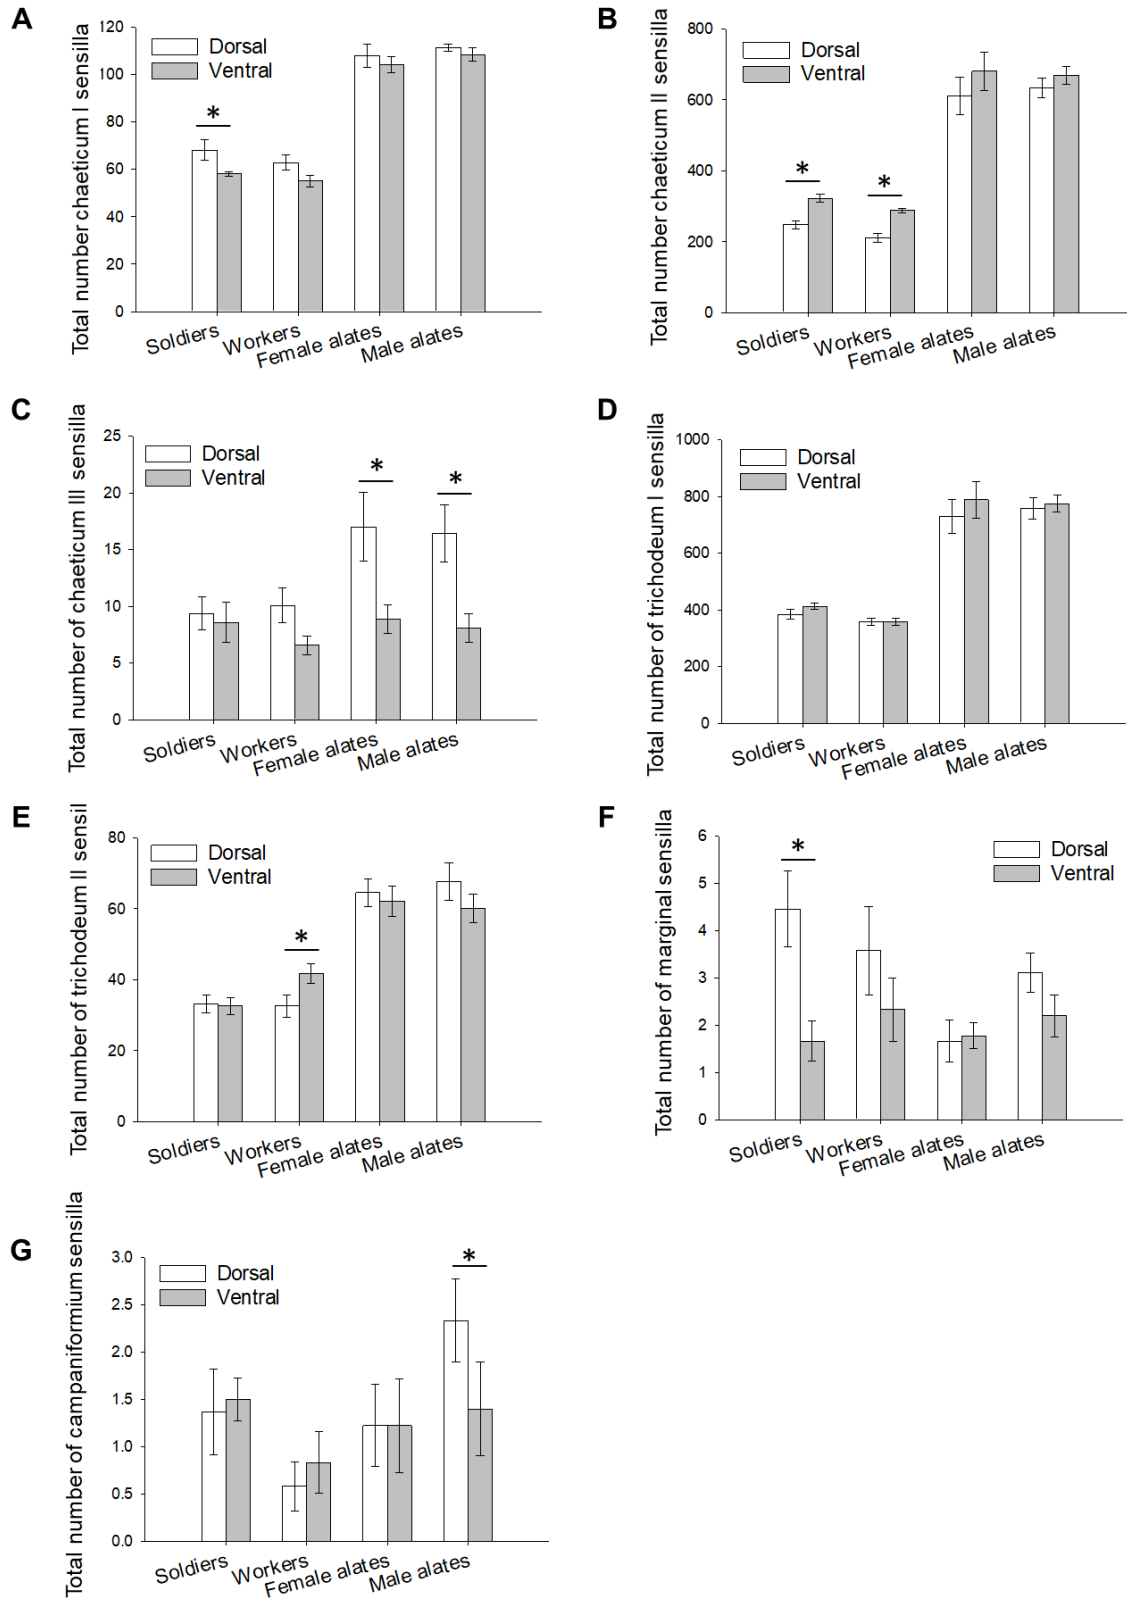

**Figure S1. Dorsal and ventral distribution of sensilla chaeticum I (A), chaeticum II (B), chaeticum III (C), trichodeum I (D), trichodeum II (E) marginal (F), and campaniformium (G).** Total number of sensilla on dorsal and ventral sides per antenna are shown (mean  $\pm$  SE; \*,  $P < 0.05$ ; unlabeled pairs,  $P > 0.05$ ; Wilcoxon rank sum tests; dorsal side: n = 11, 12, 9, and 9 for soldiers, workers, female and male alates, respectively; ventral side: n = 12, 12, 9, and 9 for soldiers, workers, female and male alates, respectively).
